# Supplementary material
Source: PubMed Central journal article supplement (PMC9514995)

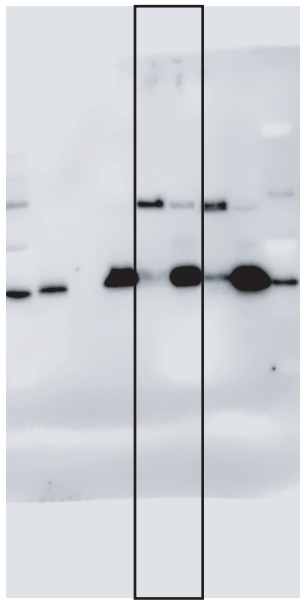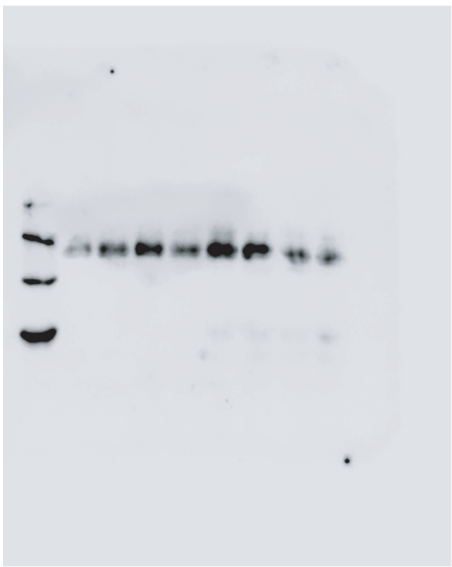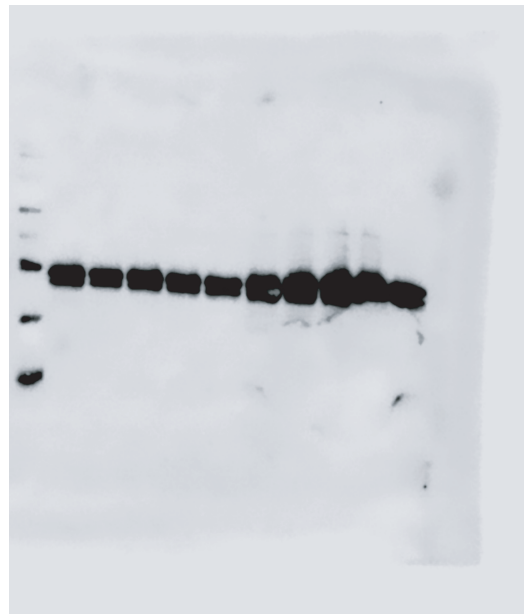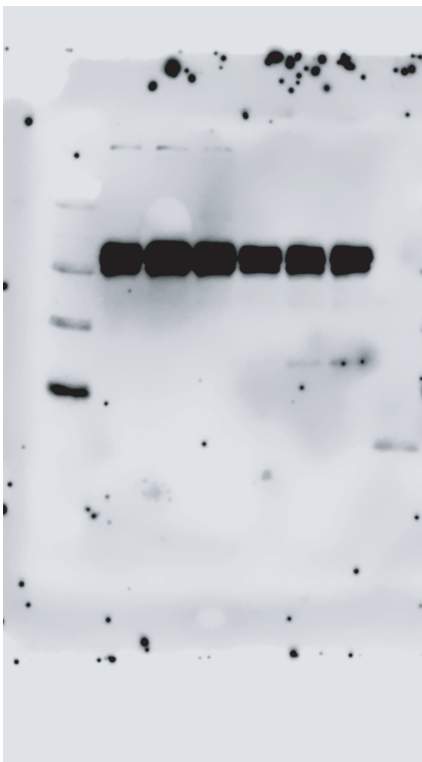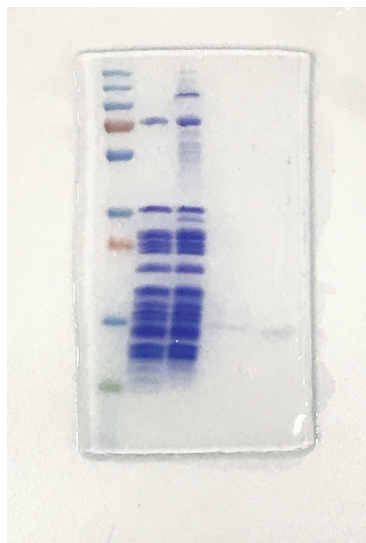

Supplement: 41557_2022_1004_MOESM9_ESM.pdf [file 41557_2022_1004_MOESM9_ESM.pdf]
